# Supplementary material
Source: PubMed Central journal article supplement (PMC7405076)
Supplement: MMBR.00005-19-s0001.pdf [file MMBR.00005-19-s0001.pdf]

1 **Persistence and Decay of Fecal Microbiota in Aquatic Habitats**

2 Asja Korajkic<sup>1</sup>, Pauline Wanjugi<sup>2</sup>, Lauren Brooks<sup>3</sup>, Yiping Cao<sup>4</sup> and Valerie J. Harwood<sup>5\*</sup>

3  
4  
5  
6  
7  
8  
9  
10 <sup>1</sup>United States Environmental Protections Agency, Cincinnati, OH 45268

11 <sup>2</sup>Wadsworth Center, New York State Department of Health Albany, NY 12201

12 <sup>3</sup>Utah Valley University, Orem, UT 84058

13 <sup>4</sup>Source Molecular, Miami, FL 33155

14 <sup>5</sup>University of South Florida, Tampa, FL 33620

15  
16  
17  
18  
19  
20  
21  
22  
23  
24  
25  
26  
27  
28  
29  
30 \*Address correspondence to:

31 Valerie J. Harwood

32 4202 East Fowler Avenue,

33 Tampa, FL 33620

34 Phone: 813-974-1524, 813-974-6229

35 Email: [vharwood@usf.edu](mailto:vharwood@usf.edu)

36  
37  
38  
39

40 **SUPPLEMENTAL MATERIALS**

41

42 **Table S1.** Effect of sunlight on decay of indicator microorganisms and pathogens in marine and freshwater. + denotes greater decay  
 43 rate in the presence of sunlight; 0 denotes no effect of sunlight on decay rate.

44

| Organism        | Effect of sunlight on decay | Spike Source                                          | Water Type         | Method                                                                                                                       | Comment                                                                                     | Other factors contributing to decay | Reference |
|-----------------|-----------------------------|-------------------------------------------------------|--------------------|------------------------------------------------------------------------------------------------------------------------------|---------------------------------------------------------------------------------------------|-------------------------------------|-----------|
| <b>FIB</b>      |                             |                                                       |                    |                                                                                                                              |                                                                                             |                                     |           |
| Fecal coliforms | + <sup>b</sup>              | Raw sewage and effluent from meat-processing facility | Seawater           | Membrane filtration on mE/esculin-iron agar (enterococci) or mFC agar (fecal coliforms)                                      | Field study. Fecal coliforms inactivated more rapidly compared to enterococci               | Temperature                         | (1)       |
| Enterococci     | + <sup>b</sup>              |                                                       |                    |                                                                                                                              |                                                                                             |                                     |           |
| Fecal coliforms | + <sup>b</sup>              | Raw sewage                                            | Seawater           | Membrane filtration on mFC agar                                                                                              | Field study. Fecal coliforms inactivated more rapidly compared to coliphages                | Temperature, seasonality            | (2)       |
| Enterococci     | + <sup>b</sup>              | Waste stabilization pond                              | Freshwater (river) | Membrane filtration on mE/esculin-iron agar (enterococci) or mFC agar/nutrient agar supplemented with MUG ( <i>E. coli</i> ) | Field study. Enterococci and <i>E. coli</i> inactivated more rapidly compared to coliphages | Seasonality, salinity               | (3)       |
| <i>E. coli</i>  | + <sup>b</sup>              |                                                       |                    |                                                                                                                              |                                                                                             |                                     |           |

|                          |                |                                   |                                 |                                                                                        |                                                                                                        |               |     |
|--------------------------|----------------|-----------------------------------|---------------------------------|----------------------------------------------------------------------------------------|--------------------------------------------------------------------------------------------------------|---------------|-----|
| <i>E. coli</i>           | + <sup>a</sup> | Raw sewage, final sewage effluent | Seawater and freshwater (creek) | Colilert (MPN)                                                                         | Field study. Enterococci decayed significantly faster compared to <i>E. coli</i>                       | Temperature   | (4) |
| Enterococci              | + <sup>a</sup> |                                   |                                 | Enterolert (MPN)                                                                       |                                                                                                        |               |     |
| <i>E. coli</i>           | + <sup>b</sup> | Waste stabilization pond          | Seawater and freshwater (river) | Membrane filtration on mFC agar/nutrient agar supplemented with MUG ( <i>E. coli</i> ) | Field study. Faster inactivation in seawater compared to freshwater                                    | Seasonality   | (5) |
| Enterococci              | + <sup>a</sup> | Human, cattle and dog feces       | Seawater                        | Membrane filtration on mEI (enterococci) and by qPCR (Enterol1a)                       | Field study. Intact cells (as determined by the PMA treatment) and DNA persisted longer                | None reported | (6) |
| <i>Enterococcus</i> qPCR | 0 <sup>a</sup> |                                   |                                 |                                                                                        |                                                                                                        |               |     |
| <i>E. coli</i>           | + <sup>a</sup> | Human and cattle feces            | Freshwater (river)              | Colilert (MPN)                                                                         | Field study. Exposure to sunlight affected culturable <i>E. coli</i> from cattle feces, but not human. | None reported | (7) |
| Enterococci              | 0 <sup>b</sup> |                                   |                                 | Enterolert (MPN)                                                                       |                                                                                                        |               |     |

|                          |                |                                     |                                 |                                                                                                                  |                                                                                                                         |                                  |      |
|--------------------------|----------------|-------------------------------------|---------------------------------|------------------------------------------------------------------------------------------------------------------|-------------------------------------------------------------------------------------------------------------------------|----------------------------------|------|
| <i>E. coli</i>           | + <sup>a</sup> | Raw sewage                          | Freshwater (river)              | Colilert (MPN)                                                                                                   | Lab study. Culturable <i>E. coli</i> inactivated more rapidly than any of the qPCR markers tested                       | Biotic interactions, sediment    | (8)  |
| Enterococci              | + <sup>b</sup> | Raw sewage                          | Seawater and freshwater (creek) | Enterolert (MPN) and by qPCR (Enterol a)                                                                         | Field study. Decay rate of DNA significantly lower compared to culturable enterococci.                                  | Water type                       | (9)  |
| <i>Enterococcus</i> qPCR | 0 <sup>b</sup> |                                     |                                 |                                                                                                                  |                                                                                                                         |                                  |      |
| <i>E. coli</i>           | + <sup>a</sup> | Strains isolated from cattle manure | Freshwater (pond)               | Colilert (MPN)                                                                                                   | Field study. Effect of sunlight appeared to be seasonal (not observed during the winter months)                         | Temperature, biotic interactions | (10) |
| Enterococci              | + <sup>a</sup> |                                     |                                 | Enterolert (MPN)                                                                                                 |                                                                                                                         |                                  |      |
| <i>E. coli</i>           | + <sup>b</sup> | Human, cattle and dog feces         | Groundwater                     | Membrane filtration on mEI (enterococci) and by qPCR (Enterol a), membrane filtration on mTEC ( <i>E. coli</i> ) | Field study. Intact cells (as determined by the PMA treatment) and DNA persisted similarly in light and dark treatments | None reported                    | (11) |
| Enterococci              | 0 <sup>a</sup> |                                     |                                 |                                                                                                                  |                                                                                                                         |                                  |      |
| <i>Enterococcus</i> qPCR | 0 <sup>a</sup> |                                     |                                 |                                                                                                                  |                                                                                                                         |                                  |      |
| <i>E. coli</i>           | 0 <sup>a</sup> | Raw sewage and cattle feces         | Freshwater (lake)               | Colilert (MPN)                                                                                                   | Field study. Water temperature had                                                                                      | Temperature                      | (12) |
| Enterococci              | 0 <sup>a</sup> |                                     |                                 | Membrane filtration on Slanetz& Bartley                                                                          |                                                                                                                         |                                  |      |

|                          |                |                                       |                                 |                                                                                                                  |                                                                                                                                                                                                                 |                                   |      |
|--------------------------|----------------|---------------------------------------|---------------------------------|------------------------------------------------------------------------------------------------------------------|-----------------------------------------------------------------------------------------------------------------------------------------------------------------------------------------------------------------|-----------------------------------|------|
|                          |                |                                       |                                 | agar, followed by Bile Esculin Azide Agar                                                                        | significant impact on decay                                                                                                                                                                                     |                                   |      |
| Enterococci              | + <sup>a</sup> | Laboratory grown strain               | Seawater                        | Enterolert (MPN), membrane filtration on mEI, spread plating on TSA and by qPCR (Enterol1a) with and without PMA | Field study. Under anoxic conditions, sunlight did not affect decay of culturable enterococci when enumerated by Enterolert and TSA, but it was a significant factor when enterococci when enumerated using mEI | Oxidative stress                  | (13) |
| <i>Enterococcus</i> qPCR | 0 <sup>a</sup> |                                       |                                 |                                                                                                                  |                                                                                                                                                                                                                 |                                   |      |
| Enterococci              | + <sup>a</sup> | Cattle manure, primary treated sewage | Seawater and freshwater (river) | Membrane filtration on mEI (enterococci) and mTEC ( <i>E. coli</i> )                                             | Field study. Sunlight significantly affected only decay of sewage-borne enterococci.                                                                                                                            | Biotic interactions, fecal source | (14) |
| <i>E. coli</i>           | 0 <sup>a</sup> |                                       |                                 |                                                                                                                  |                                                                                                                                                                                                                 |                                   |      |
| Enterococci              | + <sup>a</sup> | Primary treated sewage                | Freshwater (river)              | Membrane filtration on mEI (enterococci) and by qPCR (Enterol1a)                                                 | Field study. Sunlight exposure was more important for culturable <i>E. coli</i> compared to enterococci. There was no statistically significant correlation in decay of culturable enterococci compared         | Biotic interactions               | (15) |
| <i>Enterococcus</i> qPCR | + <sup>a</sup> |                                       |                                 |                                                                                                                  |                                                                                                                                                                                                                 |                                   |      |
| <i>E. coli</i>           | + <sup>a</sup> |                                       |                                 | Membrane filtration on mTEC                                                                                      |                                                                                                                                                                                                                 |                                   |      |

|                          |                |                         |                                               |                                                                  |                                                                                                                                                                                 |                                   |      |
|--------------------------|----------------|-------------------------|-----------------------------------------------|------------------------------------------------------------------|---------------------------------------------------------------------------------------------------------------------------------------------------------------------------------|-----------------------------------|------|
|                          |                |                         |                                               |                                                                  | to the corresponding qPCR signal.                                                                                                                                               |                                   |      |
| Enterococci              | + <sup>a</sup> | Raw sewage, human feces | Seawater                                      | Membrane filtration on mEI (enterococci) and by qPCR (Enterol1a) | Field study. Culturable enterococci and <i>E. coli</i> decayed faster than their molecular counterparts and were affected by sunlight more.                                     | Biotic interactions, fecal source | (16) |
| <i>Enterococcus</i> qPCR | + <sup>a</sup> |                         |                                               |                                                                  |                                                                                                                                                                                 |                                   |      |
| <i>E. coli</i>           | + <sup>a</sup> |                         |                                               | Membrane filtration on mTEC and by qPCR (EC23S857)               |                                                                                                                                                                                 |                                   |      |
| <i>E. coli</i> qPCR      | + <sup>a</sup> |                         |                                               |                                                                  |                                                                                                                                                                                 |                                   |      |
| Enterococci              | + <sup>b</sup> | Raw sewage              | Seawater, brackish water, freshwater (lagoon) | Enterolert (MPN)                                                 | Field study. Generally faster decay in clear (seawater) and shallow waters.                                                                                                     | None reported                     | (17) |
| <i>E. coli</i>           | + <sup>b</sup> |                         |                                               | Colilert (MPN)                                                   |                                                                                                                                                                                 |                                   |      |
| Enterococci              | + <sup>a</sup> | Raw sewage              | Seawater                                      | Enterolert (MPN) and by qPCR (Enterol1a)                         | Field study. Enterococci (culture and qPCR) decayed faster in summer than in the winter under the same sunlight intensity, while the opposite was the case for <i>E. coli</i> . | Seasonality                       | (18) |
| <i>Enterococcus</i> qPCR | + <sup>a</sup> |                         |                                               |                                                                  |                                                                                                                                                                                 |                                   |      |
| <i>E. coli</i>           | + <sup>a</sup> |                         |                                               | Colilert (MPN)                                                   |                                                                                                                                                                                 |                                   |      |

|                             |                |                          |                                 |                                                                                                                |                                                                                                                                                                                             |               |      |
|-----------------------------|----------------|--------------------------|---------------------------------|----------------------------------------------------------------------------------------------------------------|---------------------------------------------------------------------------------------------------------------------------------------------------------------------------------------------|---------------|------|
| <i>E. coli</i> qPCR         | 0 <sup>a</sup> | Cattle feces             | Freshwater (river) and seawater | qPCR                                                                                                           | Field study. <i>Enterococcus</i> qPCR signal decayed significantly faster than <i>E. coli</i> . Culturable enterococci and <i>E. coli</i> decayed faster than their molecular counterparts. | Water type    | (19) |
| <i>Enterococcus</i> qPCR    | 0 <sup>a</sup> |                          |                                 |                                                                                                                |                                                                                                                                                                                             |               |      |
| <b>Bacterial Pathogens</b>  |                |                          |                                 |                                                                                                                |                                                                                                                                                                                             |               |      |
| <i>Salmonella enterica</i>  | + <sup>b</sup> | Laboratory grown strains | Seawater and freshwater (river) | Preston broth/ Exeter agar (MPN, <i>Campylobacter</i> ), membrane filtration on XLD agar ( <i>Salmonella</i> ) | Field study. <i>Campylobacter</i> and <i>Salmonella</i> inactivated more rapidly compared to <i>E. coli</i>                                                                                 | Seasonality   | (5)  |
| <i>Campylobacter jejuni</i> | + <sup>b</sup> |                          |                                 |                                                                                                                |                                                                                                                                                                                             |               |      |
| <i>E. coli</i> O157:H7      | + <sup>b</sup> | Laboratory grown strain  | Freshwater (pond)               | Lauryl tryptose broth (LTB) enrichment combined with qPCR for confirmation (MPN)                               | Field study. Decayed significantly slower compared to FIB                                                                                                                                   | None reported | (10) |
| <i>Salmonella enterica</i>  | 0 <sup>a</sup> | Laboratory grown strains | Groundwater                     | qPCR                                                                                                           | Field study. Intact cells (as determined by the PMA treatment) but not DNA (no PMA) of <i>C. jejuni</i> decayed faster when exposed to                                                      | None reported | (11) |
| <i>Campylobacter jejuni</i> | 0 <sup>a</sup> |                          |                                 |                                                                                                                |                                                                                                                                                                                             |               |      |

|                             |                |                                   |                                 |                                                                           |                                                                                                  |                          |      |
|-----------------------------|----------------|-----------------------------------|---------------------------------|---------------------------------------------------------------------------|--------------------------------------------------------------------------------------------------|--------------------------|------|
|                             |                |                                   |                                 |                                                                           | sunlight compared to dark treatments.                                                            |                          |      |
| <i>Campylobacter jejuni</i> | + <sup>b</sup> | Laboratory grown strains          | Freshwater (river)              | Preston broth enrichment, followed by sub-culturing on Karmali agar (MPN) | Lab and field study. No correlation between decay and pH, oxygen concentrations or conductivity  | Temperature              | (20) |
| <b>Coliphage</b>            |                |                                   |                                 |                                                                           |                                                                                                  |                          |      |
| Somatic coliphage           | + <sup>b</sup> | Raw sewage                        | Seawater                        | Double agar layer and/or membrane filtration-swirling elution method      | Field study. F-RNA coliphage more susceptible to longer solar wavelengths than somatic coliphage | Temperature, seasonality | (2)  |
| F-RNA coliphage             | + <sup>b</sup> |                                   |                                 |                                                                           |                                                                                                  |                          |      |
| Somatic coliphage           | + <sup>b</sup> | Waste stabilization pond          | Freshwater (river)              | Double agar layer and/or membrane filtration-swirling elution method      | Field study. Somatic coliphage persisted longer than F-RNA coliphage                             | Seasonality, salinity    | (3)  |
| F-RNA coliphage             | + <sup>b</sup> |                                   |                                 |                                                                           |                                                                                                  |                          |      |
| F-specific coliphage        | + <sup>a</sup> | Raw sewage, final sewage effluent | Seawater and freshwater (creek) | Double agar layer                                                         | Field study. Coliphage decayed significantly slower than FIB                                     | Temperature              | (4)  |
| Somatic coliphage           | + <sup>b</sup> | Laboratory grown strains          | Seawater                        | Double agar layer                                                         | Lab study. Somatic coliphage more sensitive to light                                             | None reported            | (21) |
| F-specific coliphage        | + <sup>b</sup> |                                   |                                 |                                                                           |                                                                                                  |                          |      |



|                        |                |                             |                                                  |                   |                                                                                                                                 |                     |      |
|------------------------|----------------|-----------------------------|--------------------------------------------------|-------------------|---------------------------------------------------------------------------------------------------------------------------------|---------------------|------|
|                        |                |                             |                                                  |                   | compared to F-RNA coliphage                                                                                                     |                     |      |
| Somatic coliphage      | 0 <sup>a</sup> | Raw sewage and cattle feces | Freshwater (lake)                                | Double agar layer | Field study. Persistence significantly lower in August compared to March and November                                           | Temperature         | (12) |
| F-specific coliphage   | + <sup>b</sup> | Laboratory grown strain     | Seawater, brackish, freshwater (lagoon, wetland) | Double agar layer | Lab study. Exogenous sunlight damage caused by external reactive species was more important than the direct (endogenous) damage | Water composition   | (22) |
| F-specific coliphage   | + <sup>b</sup> | Laboratory grown strain     | Freshwater (wetland)                             | Double agar layer | Lab and field study. No significant difference in decay at two different depths (5 cm and 20 cm)                                | None reported       | (23) |
| Somatic coliphage      | + <sup>a</sup> | Raw sewage                  | Seawater                                         | Double agar layer | Field study. Somatic coliphage more sensitive to light compared to F-specific coliphage                                         | Biotic interactions | (16) |
| F-specific coliphage   | 0 <sup>a</sup> |                             |                                                  |                   |                                                                                                                                 |                     |      |
| <b>Viral Pathogens</b> |                |                             |                                                  |                   |                                                                                                                                 |                     |      |
| Adenovirus 2           | + <sup>a</sup> |                             | Seawater                                         |                   |                                                                                                                                 |                     | (21) |

|                            |                |                          |                                                  |                        |                                                                                                                                                          |                   |      |
|----------------------------|----------------|--------------------------|--------------------------------------------------|------------------------|----------------------------------------------------------------------------------------------------------------------------------------------------------|-------------------|------|
| Poliovirus 3               | + <sup>a</sup> | Laboratory grown strains |                                                  | Mammalian cell culture | Lab study. MS2 coliphage and Adenovirus2 more resistant to sunlight compared to other coliphages and Poliovirus                                          | None reported     |      |
| Adenovirus 2               | 0 <sup>a</sup> | Laboratory grown strain  | Ground water                                     | qPCR                   | Field study. No significant difference in decay compared to <i>C. jejuni</i> and <i>S. enterica</i> with respect to dark and sunlight exposed treatments | None reported     | (11) |
| Poliovirus 3               | + <sup>b</sup> | Laboratory grown strain  | Seawater, brackish, freshwater (lagoon, wetland) | Mammalian cell culture | Lab study. Generally, Poliovirus decayed faster than Adenovirus or F-specific (MS2) coliphage                                                            | Water composition | (22) |
| Adenovirus 2               | + <sup>b</sup> |                          |                                                  |                        |                                                                                                                                                          |                   |      |
| Poliovirus 3               | + <sup>b</sup> | Laboratory grown strain  | Freshwater (wetland)                             | Mammalian cell culture | Lab and field study. Inactivated slower compared to the F-specific (MS2) coliphage                                                                       | None reported     | (23) |
| <b>Protozoan Pathogens</b> |                |                          |                                                  |                        |                                                                                                                                                          |                   |      |

|                                                |                |                             |                              |                                           |                                                                                                                                                           |                               |      |
|------------------------------------------------|----------------|-----------------------------|------------------------------|-------------------------------------------|-----------------------------------------------------------------------------------------------------------------------------------------------------------|-------------------------------|------|
| <i>C. parvum</i>                               | + <sup>a</sup> | Cattle feces                | Freshwater (lake, reservoir) | Mammalian cell culture combined with qPCR | Field study. Increased dissolved organic carbon reduced inactivation                                                                                      | Water type                    | (24) |
| <b>MST Markers</b>                             |                |                             |                              |                                           |                                                                                                                                                           |                               |      |
| Human-associated (HF183, HF134)                | 0 <sup>a</sup> | Human and cattle feces      | Freshwater (river)           | qPCR                                      | Field study. Persistence of cells (as determined by RNA quantification) was significantly affected by sunlight only for the human-associated MST markers. | None reported                 | (7)  |
| Ruminant-associated (CF193)                    | 0 <sup>a</sup> |                             |                              |                                           |                                                                                                                                                           |                               |      |
| Ruminant-associated (CF128)                    | + <sup>a</sup> |                             |                              |                                           |                                                                                                                                                           |                               |      |
| General marker of fecal pollution (BacUni-UCD) | 0 <sup>a</sup> | Human, cattle and dog feces | Seawater                     | qPCR                                      | Field study. Detection of intact cells (as determined by the PMA treatment) and DNA differed significantly in both light exposed and dark treatments      | None reported                 | (6)  |
| Human-associated (BacHum-UCD)                  | 0 <sup>a</sup> |                             |                              |                                           |                                                                                                                                                           |                               |      |
| Dog-associated (BacCan-UCD)                    | 0 <sup>a</sup> |                             |                              |                                           |                                                                                                                                                           |                               |      |
| Cow-associated (BacCow-UCD)                    | + <sup>a</sup> |                             |                              |                                           |                                                                                                                                                           |                               |      |
| General marker of fecal pollution (AllBac)     | + <sup>a</sup> | Raw sewage                  | Freshwater (river)           | qPCR                                      | Lab study. Decay of human-associated                                                                                                                      | Biotic interactions, sediment | (8)  |

|                                                          |                |                             |                                 |      |                                                                                                                                                                    |               |      |
|----------------------------------------------------------|----------------|-----------------------------|---------------------------------|------|--------------------------------------------------------------------------------------------------------------------------------------------------------------------|---------------|------|
| Human-associated (HF183 and BacHum)                      | + <sup>a</sup> |                             |                                 |      | MST markers was similar                                                                                                                                            |               |      |
| General marker of fecal pollution (GenBac3)              | 0 <sup>a</sup> | Raw sewage                  | Seawater and freshwater (creek) | qPCR | Field study. Persistence longer in seawater compared to freshwater                                                                                                 | Water type    | (9)  |
| Human-associated (BsteriF1, BuniF2, HF183, HF124, HumM2) | 0 <sup>a</sup> |                             |                                 |      |                                                                                                                                                                    |               |      |
| General marker of fecal pollution (BacUni-UCD)           | 0 <sup>a</sup> | Human, cattle and dog feces | Groundwater                     | qPCR | Field study. Intact (PMA) treated cells persisted significantly longer than the (non-PMA treated) DNA. Cow associated MST marker decayed more rapidly than others. | None reported | (11) |
| Human-associated (BacHum-UCD)                            | 0 <sup>a</sup> |                             |                                 |      |                                                                                                                                                                    |               |      |
| Dog-associated (BacCan-UCD)                              | 0 <sup>a</sup> |                             |                                 |      |                                                                                                                                                                    |               |      |
| Cow-associated (BacCow-UCD)                              | 0 <sup>a</sup> |                             |                                 |      |                                                                                                                                                                    |               |      |
| Human-associated (BacH)                                  | 0 <sup>a</sup> | Raw sewage and cattle feces | Freshwater (lake)               | qPCR | Field study. Persistence of MST markers not significantly different from FIB and coliphage                                                                         | Temperature   | (12) |
| Ruminant associated (BacR)                               | 0 <sup>a</sup> |                             |                                 |      |                                                                                                                                                                    |               |      |

|                                                    |                  |                         |                                 |      |                                                                                                                              |                                   |      |
|----------------------------------------------------|------------------|-------------------------|---------------------------------|------|------------------------------------------------------------------------------------------------------------------------------|-----------------------------------|------|
| General marker of fecal pollution (GenBac3)        | + <sup>a</sup>   | Primary treated sewage  | Freshwater (river)              | qPCR | Field study. More pronounced effect of sunlight in the early stages of decay (< 72 hours) compared to subsequent time points | Biotic interactions               | (15) |
| Human-associated (HF183 and HumM2)                 | + <sup>a</sup>   |                         |                                 |      |                                                                                                                              |                                   |      |
| General marker of fecal pollution (GenBac3)        | 0 <sup>a</sup>   | Cattle feces            | Freshwater (river) and seawater | qPCR | Field study. Sunlight affected the decay of CowM2 and Rum2Bac, but not CowM3                                                 | Water type                        | (19) |
| Cattle/ruminant associated (CowM2, CowM3, Rum2Bac) | +/0 <sup>a</sup> |                         |                                 |      |                                                                                                                              |                                   |      |
| Human-associated (HF183 and HumM2)                 | + <sup>a</sup>   | Raw sewage, human feces | Seawater                        | qPCR | Field study. The magnitude of the effect varied across different time points and pollution sources                           | Biotic interactions, fecal source | (16) |
| General marker of fecal pollution (GenBac3)        | + <sup>a</sup>   |                         |                                 |      |                                                                                                                              |                                   |      |
| General marker of fecal pollution (GenBac3)        | 0 <sup>a</sup>   | Raw sewage              | Seawater                        | qPCR | Field study. When exposed to sunlight, culturable FIB decayed significantly faster than the MST markers                      | None reported                     | (18) |
| Human-associated (HF183, HumM2 and BacHum)         | 0 <sup>a</sup>   |                         |                                 |      |                                                                                                                              |                                   |      |

45

46 <sup>a</sup>Statistical significance reported

47 <sup>b</sup>Statistical significance not reported

48

49 **REFERENCES**

50

51 1. **Sinton LW, Davies-Colley RJ, Bell RG.** 1994. Inactivation of enterococci and fecal coliforms from  
 52 sewage and meatworks effluents in seawater chambers. *Appl Environ Microbiol* **60**:2040-2048.

53 2. **Sinton LW, Finlay RK, Lynch PA.** 1999. Sunlight inactivation of fecal bacteriophages and bacteria in  
 54 sewage-polluted seawater. *Appl Environ Microbiol* **65**:3605-3613.

55 3. **Sinton LW, Hall CH, Lynch PA, Davies-Colley RJ.** 2002. Sunlight inactivation of fecal indicator  
 56 bacteria and bacteriophages from waste stabilization pond effluent in fresh and saline waters. *Appl Environ*  
 57 *Microbiol* **68**:1122-1131.

58 4. **Noble RT, Lee IM, Schiff KC.** 2004. Inactivation of indicator micro-organisms from various sources of  
 59 faecal contamination in seawater and freshwater. *J Appl Microbiol* **96**:464-472.

60 5. **Sinton L, Hall C, Braithwaite R.** 2007. Sunlight inactivation of *Campylobacter jejuni* and *Salmonella*  
 61 *enterica*, compared with *Escherichia coli*, in seawater and river water. *J Water Health* **5**:357-365.

62 6. **Bae S, Wuertz S.** 2009. Rapid decay of host-specific fecal *Bacteroidales* cells in seawater as measured by  
 63 quantitative PCR with propidium monoazide. *Water Res* **43**:4850-4859.

64 7. **Walters SP, Field KG.** 2009. Survival and persistence of human and ruminant-specific faecal  
 65 *Bacteroidales* in freshwater microcosms. *Environ Microbiol* **11**:1410-1421.

66 8. **Dick LK, Stelzer EA, Bertke EE, Fong DL, Stoeckel DM.** 2010. Relative decay of *Bacteroidales*  
 67 microbial source tracking markers and cultivated *Escherichia coli* in freshwater microcosms. *Appl Environ*  
 68 *Microbiol* **76**:3255-3262.

69 9. **Green HC, Shanks OC, Sivaganesan M, Haugland RA, Field KG.** 2011. Differential decay of human  
 70 faecal *Bacteroides* in marine and freshwater. *Environ Microbiol* **13**:3235-3249.

71 10. **Jenkins MB, Fisher DS, Endale DM, Adams P.** 2011. Comparative die-off of *Escherichia coli* O157:H7  
 72 and fecal indicator bacteria in pond water. *Environ Sci Technol* **45**:1853-1858.

73 11. **Bae S, Wuertz S.** 2012. Survival of host-associated bacteroidales cells and their relationship with  
 74 *Enterococcus* spp., *Campylobacter jejuni*, *Salmonella enterica* serovar Typhimurium, and adenovirus in  
 75 freshwater microcosms as measured by propidium monoazide-quantitative PCR. *Appl Environ Microbiol*  
 76 **78**:922-932.

77 12. **Sokolova E, Astrom J, Pettersson TJ, Bergstedt O, Hermansson M.** 2012. Decay of *Bacteroidales*  
 78 genetic markers in relation to traditional fecal indicators for water quality modeling of drinking water  
 79 sources. *Environ Sci Technol* **46**:892-900.

80 13. **Sassoubre LM, Nelson KL, Boehm AB.** 2012. Mechanisms for photoinactivation of *Enterococcus*  
 81 *faecalis* in seawater. *Appl Environ Microbiol* **78**:7776-7785.

82 14. **Korajkic A, McMinn BR, Harwood VJ, Shanks OC, Fout GS, Ashbolt NJ.** 2013. Differential decay of  
 83 enterococci and *Escherichia coli* originating from two fecal pollution sources. *Appl Environ Microbiol*  
 84 **79**:2488-2492.

85 15. **Korajkic A, McMinn BR, Shanks OC, Sivaganesan M, Fout GS, Ashbolt NJ.** 2014. Biotic interactions  
 86 and sunlight affect persistence of fecal indicator bacteria and microbial source tracking genetic markers in  
 87 the upper Mississippi river. *Appl Environ Microbiol* **80**:3952-3961.

88 16. **Wanjugi P, Sivaganesan M, Korajkic A, Kelty CA, McMinn B, Ulrich R, Harwood VJ, Shanks OC.**  
 89 2016. Differential decomposition of bacterial and viral fecal indicators in common human pollution types.  
 90 *Water Res* **105**:591-601.

91 17. **Maraccini PA, Mattioli MC, Sassoubre LM, Cao Y, Griffith JF, Ervin JS, Van De Werfhorst LC,**  
 92 **Boehm AB.** 2016. Solar Inactivation of Enterococci and *Escherichia coli* in Natural Waters: Effects of  
 93 Water Absorbance and Depth. *Environ Sci Technol* **50**:5068-5076.

94 18. **Mattioli MC, Sassoubre LM, Russell TL, Boehm AB.** 2017. Decay of sewage-sourced microbial source  
 95 tracking markers and fecal indicator bacteria in marine waters. *Water Res* **108**:106-114.

96 19. **Korajkic A, McMinn BR, Ashbolt NJ, Sivaganesan M, Harwood VJ, Shanks OC.** 2019. Extended  
 97 persistence of general and cattle-associated fecal indicators in marine and freshwater environment. *Sci*  
 98 *Total Environ* **650**:1292-1302.

99 20. **Rodriguez S, Araujo R.** 2012. Effect of environmental parameters on the inactivation of the waterborne  
 100 pathogen *Campylobacter* in a Mediterranean river. *J Water Health* **10**:100-107.

101 21. **Love DC, Silverman A, Nelson KL.** 2010. Human virus and bacteriophage inactivation in clear water by  
 102 simulated sunlight compared to bacteriophage inactivation at a southern California beach. *Environ Sci*  
 103 *Technol* **44**:6965-6970.

- 104 22. **Silverman AI, Peterson BM, Boehm AB, McNeill K, Nelson KL.** 2013. Sunlight inactivation of human  
105 viruses and bacteriophages in coastal waters containing natural photosensitizers. *Environ Sci Technol*  
106 **47**:1870-1878.
- 107 23. **Silverman AI, Nguyen MT, Schilling IE, Wenk J, Nelson KL.** 2015. Sunlight inactivation of viruses in  
108 open-water unit process treatment wetlands: modeling endogenous and exogenous inactivation rates.  
109 *Environ Sci Technol* **49**:2757-2566.
- 110 24. **King BJ, Hoefel D, Daminato DP, Fanok S, Monis PT.** 2008. Solar UV reduces *Cryptosporidium*  
111 *parvum* oocyst infectivity in environmental waters. *J Appl Microbiol* **104**:1311-1323.
- 112
